# Supplementary material
Source: publisher site journal article supplement (https://www.spandidos-publications.com/6581/downloadSupplementary)
Supplement: Supplementary file 1 [file downloadSupplementary]

## Sheet: Fig1B.
Table SI. Reverse transcription-quantitative PCR values and P-values.
LNCaP
	AR			NKX3-1			TMRPSS2			FKBP5			KLK3
Vehicle	1	1	1	1	1	1	1	1	1	1	1	1	1	1	1
Enz 10µM	1.66102	1.61964	1.75276	0.223287	0.1642	0.156737	0.197459	0.162021	0.21321	0.171369	0.222839	0.350538	0.095363	0.257445	0.094345
ADA-308 1µM	1.6064	1.46575	3.53271	0.500363	0.424167	0.361759	0.321285	0.294806	0.293015	0.24018	0.309804	0.489824	0.426662	0.724959	0.728642
ADA-308 2µM	1.49445	1.54267	1.44239	0.309998	0.264538	0.420125	0.227009	0.22903	0.500383	0.190726	0.275143	0.324386	0.139699	0.491231	0.221945
ADA-308 5µM	1.56584	1.60862	1.70601	0.177904	0.17806	0.153468	0.168658	0.221438	0.214881	0.149191	0.171072	0.164305	0.036073	0.166296	0.064148
ADA-308 7.5µM	1.60133	1.57783	1.59602	0.168569	0.158746	0.301238	0.150016	0.160186	0.221464	0.169047	0.214866	0.346212	0.018603	0.172055	0.197695
ADA-308 10µM	1.94914	1.68166	1.7718	0.182984	0.172794	0.214907	0.170539	0.129755	0.232608	0.196716	0.240641	0.320128	0.024951	0.093668	0.1038
49FENZR
	AR		NKX3-1		TMRPSS2		FKBP5		KLK3
Enz 10µM	1	1	1	1	1	1	1	1	1	1
ADA-308 1µM	1.09553	1.0446	0.67315	0.629371	1.00262	0.645769	0.409195	0.411208	0.743438	0.57896
ADA-308 2µM	1.09919	1.4396	0.570322	0.254379	0.826667	0.659507	0.390279	0.272399	0.71695	0.577473
ADA-308 5µM	1.09432	1.46139	0.515416	0.142393	0.70555	0.560733	0.310704	0.202019	0.759305	0.517905
ADA-308 7.5µM	1.24793	1.33163	0.450331	0.152963	0.70771	0.567586	0.316118	0.196144	0.73505	0.576377
ADA-308 10µM	1.25884	1.61378	0.49318	0.179659	0.613769	0.596755	0.314847	0.225746	0.582637	0.553198
49CENZR	AR		NKX3-1		TMPRSS2		FKBP5		KLK3
Enz 10µM	1	1	1	1	1	1	1	1	1	1
ADA-308 1µM	1.05359	0.780395	0.618758	0.894742	0.884994	0.908185	0.472037	0.437583	0.531086	0.726374
ADA-308 2µM	1.15739	1.00555	0.415682	0.410292	1.26656	1.05671	0.290964	0.319331	0.56447	0.662611
ADA-308 5µM	1.66645	1.3427	0.240975	0.404749	0.929008	1.34827	0.227035	0.28709	0.623994	0.801485
ADA-308 7.5µM	1.65451	1.5473	0.222429	0.342502	0.82957	1.09595	0.220067	0.264384	0.531996	0.625479
ADA-308 10µM	1.70911	1.70334	0.218903	0.427061	0.78345	1.28774	0.230753	0.315778	0.48779	0.725147

## Sheet: Fig 1B
Dunnett's multiple comparisons test	Mean Diff.	95.00% CI of diff.	Significant?	Summary	Adjusted P Value	A-?
Vehicle vs. Enz 10µM	0.8076	0.6714 to 0.9438	Yes	****	<0.0001	B	Enz 10µM
Vehicle vs. #30 1µM	0.5737	0.4375 to 0.7099	Yes	****	<0.0001	C	#30 1µM
Vehicle vs. ADA 2µM	0.7005	0.5643 to 0.8367	Yes	****	<0.0001	D	ADA 2µM
Vehicle vs. ADA 5µM	0.8445	0.7084 to 0.9807	Yes	****	<0.0001	E	ADA 5µM
Vehicle vs. ADA 7.5µM	0.8101	0.6739 to 0.9463	Yes	****	<0.0001	F	ADA 7.5µM
Vehicle vs. ADA 7.5µM	0.8264	0.6902 to 0.9626	Yes	****	<0.0001	G	ADA 7.5µM

## Sheet: Fig 1C
Dunnett's multiple comparisons test	Mean Diff.	95.00% CI of diff.	Significant?	Summary	Adjusted P Value	A-?
DMSO vs. Enz	0.9985	0.9960 to 1.001	Yes	****	<0.0001	B	Enz
DMSO vs. ODM-201	0.9998	0.9972 to 1.002	Yes	****	<0.0001	C	ODM201
DMSO vs. ADA-308	0.9985	0.9960 to 1.001	Yes	****	<0.0001	D	ADA308

## Sheet: Fig 1E
Dunnett's multiple comparisons test	Mean Diff.	95.00% CI of diff.	Significant?	Summary	Adjusted P Value	A-?
Enz 10µM vs. #30 1µM	0.3158	-0.02420 to 0.6558	No	ns	0.0729	B	#30 1µM
Enz 10µM vs. ADA 2µM	0.3767	0.03669 to 0.7167	Yes	*	0.0278	C	ADA 2µM
Enz 10µM vs. ADA 5µM	0.3922	0.05219 to 0.7322	Yes	*	0.0217	D	ADA 5µM
Enz 10µM vs. ADA 7.5µM	0.4835	0.1435 to 0.8234	Yes	**	0.0049	E	ADA 7.5µM
Enz 10µM vs. ADA 10µM	0.4404	0.1004 to 0.7804	Yes	**	0.0098	F	ADA 10µM
						N2	q	DF
						2	0.4977	30
						2	1.914	30
						2	1.974	30
						2	2.059	30
						2	3.1	30
						2	2.478	30
						2	4.175	30
						2	4.768	30
						2	4.961	30
						2	4.714	30
						2	1.249	30
						2	1.825	30
						2	2.606	30
						2	2.574	30
						2	2.804	30
						2	4.19	30
						2	4.75	30
						2	5.283	30
						2	5.285	30
						2	5.184	30
						2	2.407	30
						2	2.506	30
						2	2.567	30
						2	2.446	30
						2	3.07	30

## Sheet: Fig 1F
Dunnett's multiple comparisons test	Mean Diff.	95.00% CI of diff.	Significant?	Summary	Adjusted P Value	A-?
Enz vs. ODM	0.9921	0.9335 to 1.051	Yes	****	<0.0001	B	ODM201
Enz vs. ADA308	0.9424	0.8838 to 1.001	Yes	****	<0.0001	C	ADA308

## Sheet: Fig S1b
Dunnett's multiple comparisons test	Mean Diff.	95.00% CI of diff.	Significant?	Summary	Adjusted P Value	A-?
Enz 10µM vs. #30 1µM	0.3633	0.1835 to 0.5430	Yes	***	0.0002	B	#30 1µM
Enz 10µM vs. ADA 2µM	0.4665	0.2868 to 0.6463	Yes	****	<0.0001	C	ADA 2µM
Enz 10µM vs. ADA 5µM	0.5357	0.3560 to 0.7155	Yes	****	<0.0001	D	ADA 5µM
Enz 10µM vs. ADA 7.5µM	0.5372	0.3575 to 0.7170	Yes	****	<0.0001	E	ADA 7.5µM
Enz 10µM vs. ADA 10µM	0.555	0.3753 to 0.7348	Yes	****	<0.0001	F	ADA 10µM

## Sheet: Fig S1C
Dunnett's multiple comparisons test	Mean Diff.	95.00% CI of diff.	Significant?	Summary	Adjusted P Value	A-?
Enz vs. ODM	0.9954	0.9865 to 1.004	Yes	****	<0.0001	B	ODM
Enz vs. ADA308	0.9786	0.9696 to 0.9875	Yes	****	<0.0001	C	ADA308

## Sheet: Fig S2b
49F
Dunnett's multiple comparisons test	Mean Diff.	95.00% CI of diff.	Significant?	Summary	Adjusted P Value	A-?
Enz 10µM vs. ADA 20uM	6.498	3.560 to 9.436	Yes	**	0.0056	B	ADA 20uM
Enz 10µM vs. ODM201	14.06	11.12 to 17.00	Yes	***	0.0006	C	ODM201
ADA 20uM vs. ODM201	7.564	4.626 to 10.50	Yes	**	0.0036	C	ODM201
49C
Dunnett's multiple comparisons test	Mean Diff.	95.00% CI of diff.	Significant?	Summary	Adjusted P Value	A-?
Enz 10µM vs. ADA 20uM	14.99	13.29 to 16.70	Yes	***	0.0001	B	ADA 20uM
Enz 10µM vs. ODM201	25.48	23.78 to 27.19	Yes	****	<0.0001	C	ODM201
ADA 20uM vs. ODM201	10.49	8.786 to 12.19	Yes	***	0.0003	C	ODM201

## Sheet: Fig 5d
Number of families	1
Number of comparisons per family	4
Alpha	0.05
Dunnett's multiple comparisons test	Mean Diff.	Significant?	Summary		B-?
Vehicle vs. ENZ	-198.5	No	ns		C
Vehicle vs. ADA308 25mg/kg	810.8	Yes	**		D
Vehicle vs. ADA308 50mg/kg	811.8	Yes	**		E
Vehicle vs. ODM-201	612.9	Yes	*		F
Test details	Mean 1	Mean 2	Mean Diff.	SE of diff.	n1	n2	t	DF
Vehicle 2 vs. Enzalutamide	1477	1676	-198.5	244.2	4	6	0.8126	40
Vehicle 2 vs. 429_25	1477	666.4	810.8	220.9	4	11	3.67	40
Vehicle 2 vs. 429_50	1477	665.3	811.8	218.4	4	12	3.716	40
Vehicle 2 vs. ODM-201	1477	864.2	612.9	218.4	4	12	2.806	40

## Sheet: Fig 5e
Number of families	1
Number of comparisons per family	4
Alpha	0.05
Dunnett's multiple comparisons test	Mean Diff.	95% CI of diff.	Significant?	Summary		A-?
Vehicle vs. ENZ	-156.9	-324.4 to 10.53	No	ns		B
Vehicle vs. ADA308 25mg/kg	188.4	45.63 to 331.2	Yes	**		C
Vehicle vs. ADA308 50mg/kg	224.1	83.98 to 364.2	Yes	***		D
Vehicle vs. ODM-201	110.1	-30.04 to 250.2	No	ns		E
Test details	Mean 1	Mean 2	Mean Diff.	SE of diff.	n1	n2	q	DF
Vehicle vs. Xtandi	346.8	503.8	-156.9	66.15	9	6	2.372	45
Vehicle vs. 429_25	346.8	158.4	188.4	56.41	9	11	3.34	45
Vehicle vs. 429_50	346.8	122.8	224.1	55.34	9	12	4.049	45
Vehicle vs. ODM-201	346.8	236.8	110.1	55.34	9	12	1.989	45
